# Supplementary material for: Ethylenediamine complexes of the beryllium halides and pseudo-halides
Source: Royal Society of Chemistry journal article supplement (doi:10.1039/d1dt01154e), 2021-01-01
Supplement: d1dt01154e1.pdf [file d1dt01154e1.pdf]

Supporting Information for

**Ethylenediamine complexes of  
the beryllium halides and pseudo-halides**

Magnus R. Buchner\* and Matthias Müller

*Philipps-Universität Marburg, Germany*

**Table of Contents**

|                                      |       |
|--------------------------------------|-------|
| X-Ray Crystallographic Details ..... | S2–S4 |
| NMR Spectra.....                     | S5–S7 |
| IR Spectra.....                      | S8–S9 |

# 1 X-ray Crystallographic Details

**Table S1** Crystal data and details of the structure determination of BeF<sub>2</sub>(en), [Be(en)<sub>3</sub>]Cl<sub>2</sub> and [Be(en)<sub>3</sub>]Br<sub>2</sub>.

|                                                     | BeF <sub>2</sub> (en)                                            | [Be(en) <sub>3</sub> ]Cl <sub>2</sub>                                            | [Be(en) <sub>3</sub> ]Br <sub>2</sub>                                            |
|-----------------------------------------------------|------------------------------------------------------------------|----------------------------------------------------------------------------------|----------------------------------------------------------------------------------|
| Empirical formula                                   | BeF <sub>2</sub> (C <sub>2</sub> H <sub>8</sub> N <sub>2</sub> ) | [Be(C <sub>2</sub> H <sub>8</sub> N <sub>2</sub> ) <sub>2</sub> ]Cl <sub>2</sub> | [Be(C <sub>2</sub> H <sub>8</sub> N <sub>2</sub> ) <sub>2</sub> ]Br <sub>2</sub> |
| Relative molecular mass                             | 107.12                                                           | 260.22                                                                           | 349.14                                                                           |
| Crystal system                                      | monoclinic                                                       | triclinic                                                                        | triclinic                                                                        |
| Space group (No.)                                   | C2/c (15)                                                        | P $\bar{1}$ (2)                                                                  | P $\bar{1}$ (2)                                                                  |
| Radiation / Å                                       | 1.54178                                                          | 1.54178                                                                          | 1.54178                                                                          |
| <i>a</i> / Å                                        | 8.7146(4)                                                        | 7.3971(2)                                                                        | 7.5193(3)                                                                        |
| <i>b</i> / Å                                        | 6.1071(3)                                                        | 7.4939(2)                                                                        | 7.6801(4)                                                                        |
| <i>c</i> / Å                                        | 8.9467(5)                                                        | 12.4382(3)                                                                       | 12.6503(5)                                                                       |
| $\alpha$ / deg                                      | —                                                                | 101.461(2)                                                                       | 79.817(4)                                                                        |
| $\beta$ / deg                                       | 93.483(4)                                                        | 97.088(2)                                                                        | 83.317(3)                                                                        |
| $\gamma$ / deg                                      | —                                                                | 90.561(2)                                                                        | 89.851(4)                                                                        |
| <i>V</i> / Å <sup>3</sup>                           | 475.27(4)                                                        | 670.16(3)                                                                        | 714.03(6)                                                                        |
| <i>T</i> / K                                        | 100(2)                                                           | 100(2)                                                                           | 100(2)                                                                           |
| <i>Z</i>                                            | 4                                                                | 2                                                                                | 2                                                                                |
| <i>F</i> (000) / <i>e</i>                           | 224                                                              | 280                                                                              | 352                                                                              |
| <i>d</i> <sub>calc.</sub> / g cm <sup>-3</sup>      | 1.50                                                             | 1.29                                                                             | 1.62                                                                             |
| $\mu$ / mm <sup>-1</sup>                            | 1.3                                                              | 4.2                                                                              | 7.1                                                                              |
| $\vartheta$ / deg                                   | 8.872–78.274                                                     | 3.656–77.319                                                                     | 3.575–76.561                                                                     |
| Range of Miller indices                             | –10 ≤ <i>h</i> ≤ 10<br>–7 ≤ <i>k</i> ≤ 5<br>–10 ≤ <i>l</i> ≤ 11  | –9 ≤ <i>h</i> ≤ 7<br>–9 ≤ <i>k</i> ≤ 8<br>–15 ≤ <i>l</i> ≤ 15                    | –9 ≤ <i>h</i> ≤ 9<br>–9 ≤ <i>k</i> ≤ 6<br>–15 ≤ <i>l</i> ≤ 15                    |
| Reflections collected / unique                      | 2315 / 504                                                       | 11859 / 2791                                                                     | 7894 / 2883                                                                      |
| Restraints / parameters                             | 0 / 49                                                           | 0 / 233                                                                          | 0 / 153                                                                          |
| <i>R</i> <sub>int</sub>                             | 0.0099                                                           | 0.0351                                                                           | 0.0151                                                                           |
| <i>R</i> <sub>1</sub> ( <i>I</i> > 2σ( <i>I</i> ))  | 0.0330                                                           | 0.0358                                                                           | 0.0215                                                                           |
| <i>R</i> <sub>1</sub> (all data)                    | 0.0357                                                           | 0.0389                                                                           | 0.0238                                                                           |
| <i>wR</i> <sub>2</sub> ( <i>I</i> > 2σ( <i>I</i> )) | 0.0846                                                           | 0.0932                                                                           | 0.0543                                                                           |
| <i>wR</i> <sub>2</sub> (all data)                   | 0.0864                                                           | 0.0960                                                                           | 0.0556                                                                           |
| <i>S</i>                                            | 1.134                                                            | 1.071                                                                            | 1.067                                                                            |
| $\Delta\rho_{\text{min, max}}$ / e Å <sup>-3</sup>  | –0.27, 0.23                                                      | –0.48, 0.45                                                                      | –0.53, 0.51                                                                      |

**Table S2** Crystal data and details of the structure determination of  $[\text{Be}(\text{en})_2]\text{I}_2 \cdot \text{en}$  and  $[\text{Be}(\text{en})_2](\text{N}_3)_2 \cdot \text{en}$ .

|                                                    | $[\text{Be}(\text{en})_2]\text{I}_2 \cdot \text{en}$                                           | $[\text{Be}(\text{en})_2](\text{N}_3)_2 \cdot \text{en}$                                           |
|----------------------------------------------------|------------------------------------------------------------------------------------------------|----------------------------------------------------------------------------------------------------|
| Empirical formula                                  | $[\text{Be}(\text{C}_2\text{H}_8\text{N}_2)_2]\text{I}_2 \cdot \text{C}_2\text{H}_8\text{N}_2$ | $[\text{Be}(\text{C}_2\text{H}_8\text{N}_2)_2](\text{N}_3)_2 \cdot \text{C}_2\text{H}_8\text{N}_2$ |
| Relative molecular mass                            | 443.12                                                                                         | 273.38                                                                                             |
| Crystal system                                     | monoclinic                                                                                     | monoclinic                                                                                         |
| Space group (No.)                                  | C2/c (15)                                                                                      | C2/c (15)                                                                                          |
| Radiation / Å                                      | 1.54178                                                                                        | 1.54178                                                                                            |
| $a$ / Å                                            | 11.5044(3)                                                                                     | 10.5030(4)                                                                                         |
| $b$ / Å                                            | 8.39210(10)                                                                                    | 9.3016(3)                                                                                          |
| $c$ / Å                                            | 15.9669(4)                                                                                     | 14.8498(6)                                                                                         |
| $\beta$ / deg                                      | 100.712(2)                                                                                     | 105.734(3)                                                                                         |
| $V$ / Å <sup>3</sup>                               | 1514.68(6)                                                                                     | 1396.39(9)                                                                                         |
| $T$ / K                                            | 100(2)                                                                                         | 100(2)                                                                                             |
| $Z$                                                | 4                                                                                              | 4                                                                                                  |
| $F(000)$ / $e$                                     | 848                                                                                            | 592                                                                                                |
| $d_{\text{calc.}}$ / $\text{g cm}^{-3}$            | 1.94                                                                                           | 1.30                                                                                               |
| $\mu$ / $\text{mm}^{-1}$                           | 32.5                                                                                           | 0.8                                                                                                |
| $\vartheta$ / deg                                  | 5.640–78.776                                                                                   | 6.192–76.083                                                                                       |
| Range of Miller indices                            | $-14 \leq h \leq 13$<br>$-7 \leq k \leq 10$<br>$-20 \leq l \leq 20$                            | $-13 \leq h \leq 13$<br>$-10 \leq k \leq 5$<br>$-18 \leq l \leq 18$                                |
| Reflections collected / unique                     | 1626 / 1578                                                                                    | 1428 / 1250                                                                                        |
| Restraints / parameters                            | 0 / 118                                                                                        | 0 / 135                                                                                            |
| $R_{\text{int}}$                                   | 0.0463                                                                                         | 0.0207                                                                                             |
| $R_1$ ( $I > 2\sigma(I)$ )                         | 0.0392                                                                                         | 0.0308                                                                                             |
| $R_1$ (all data)                                   | 0.0398                                                                                         | 0.0355                                                                                             |
| $wR_2$ ( $I > 2\sigma(I)$ )                        | 0.1152                                                                                         | 0.0853                                                                                             |
| $wR_2$ (all data)                                  | 0.1165                                                                                         | 0.0883                                                                                             |
| $S$                                                | 1.042                                                                                          | 1.036                                                                                              |
| $\Delta\rho_{\text{min, max}}$ / $\text{e Å}^{-3}$ | -1.67, 2.33                                                                                    | -0.19, 0.19                                                                                        |

**Table S3** Crystal data and details of the structure determination of  $[\text{Be}(\text{en})_2]_4(\text{SCN})_7\text{Cl}$  and  $[\text{Be}_3(\text{OH})_3(\text{en})_3][\text{C}_2\text{H}_9\text{N}_2](\text{SCN})_4$ .

|                                                    | $[\text{Be}(\text{en})_2]_4(\text{SCN})_7\text{Cl}$                      | $[\text{Be}_3(\text{OH})_3(\text{en})_3][\text{C}_2\text{H}_9\text{N}_2](\text{SCN})_4$                      |
|----------------------------------------------------|--------------------------------------------------------------------------|--------------------------------------------------------------------------------------------------------------|
| Empirical formula                                  | $[\text{Be}(\text{C}_2\text{H}_8\text{N}_2)_2]_4(\text{SCN})_7\text{Cl}$ | $[\text{Be}_3(\text{OH})_3(\text{C}_2\text{H}_8\text{N}_2)_3][\text{C}_2\text{H}_9\text{N}_2](\text{SCN})_4$ |
| Relative molecular mass                            | 958.88                                                                   | 551.80                                                                                                       |
| Crystal system                                     | monoclinic                                                               | triclinic                                                                                                    |
| Space group (No.)                                  | $P2_1/c$ (14)                                                            | $P\bar{1}$ (2)                                                                                               |
| Radiation / Å                                      | 1.54178                                                                  | 1.54178                                                                                                      |
| $a$ / Å                                            | 13.9529(2)                                                               | 10.5372(3)                                                                                                   |
| $b$ / Å                                            | 14.0186(3)                                                               | 11.0027(3)                                                                                                   |
| $c$ / Å                                            | 48.6062(7)                                                               | 13.3669(3)                                                                                                   |
| $\alpha$ / deg                                     | —                                                                        | 104.350(2)                                                                                                   |
| $\beta$ / deg                                      | 90.185(1)                                                                | 109.886(2)                                                                                                   |
| $\gamma$ / deg                                     | —                                                                        | 97.482(2)                                                                                                    |
| $V$ / Å <sup>3</sup>                               | 9507.3(3)                                                                | 1372.15(7)                                                                                                   |
| $T$ / K                                            | 100(2)                                                                   | 100(2)                                                                                                       |
| $Z$                                                | 8                                                                        | 2                                                                                                            |
| $F(000)$ / $e$                                     | 4064                                                                     | 584                                                                                                          |
| $d_{\text{calc.}}$ / $\text{g cm}^{-3}$            | 1.34                                                                     | 1.33                                                                                                         |
| $\mu$ / $\text{mm}^{-1}$                           | 4.0                                                                      | 3.5                                                                                                          |
| $\vartheta$ / deg                                  | 2.727–78.499                                                             | 3.703–79.056                                                                                                 |
| Range of Miller indices                            | $-17 \leq h \leq 11$<br>$-17 \leq k \leq 15$<br>$-60 \leq l \leq 61$     | $-12 \leq h \leq 6$<br>$-13 \leq k \leq 13$<br>$-15 \leq l \leq 16$                                          |
| Reflections collected / unique                     | 19416 / 15177                                                            | 5678 / 4827                                                                                                  |
| Restraints / parameters                            | 363 / 1130                                                               | 0 / 376                                                                                                      |
| $R_{\text{int}}$                                   | 0.0317                                                                   | 0.0253                                                                                                       |
| $R_1$ ( $I > 2\sigma(I)$ )                         | 0.0554                                                                   | 0.0307                                                                                                       |
| $R_1$ (all data)                                   | 0.0775                                                                   | 0.0403                                                                                                       |
| $wR_2$ ( $I > 2\sigma(I)$ )                        | 0.1331                                                                   | 0.0727                                                                                                       |
| $wR_2$ (all data)                                  | 0.1498                                                                   | 0.0775                                                                                                       |
| $S$                                                | 1.031                                                                    | 1.013                                                                                                        |
| $\Delta\rho_{\text{min, max}}$ / $\text{e Å}^{-3}$ | -0.79, 1.02                                                              | -0.28, 0.28                                                                                                  |

## 2 NMR Spectra

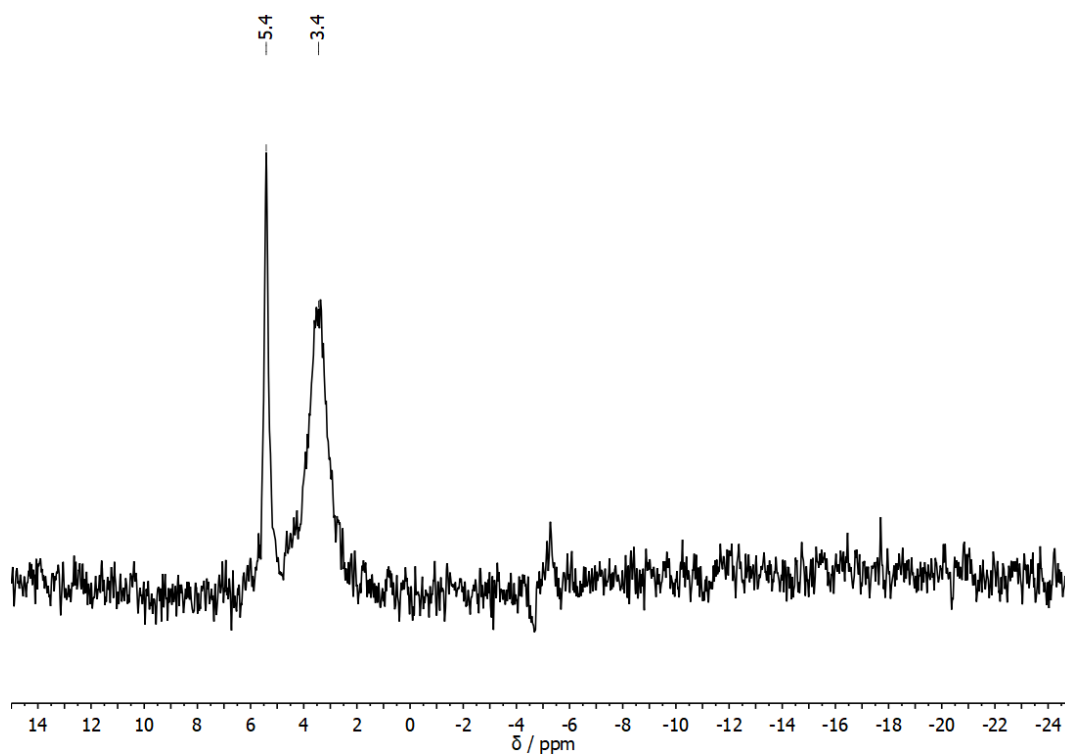

**Figure S1**  $^9\text{Be}$  NMR spectrum of  $\text{BeCl}_2$  in ethylenediamine.

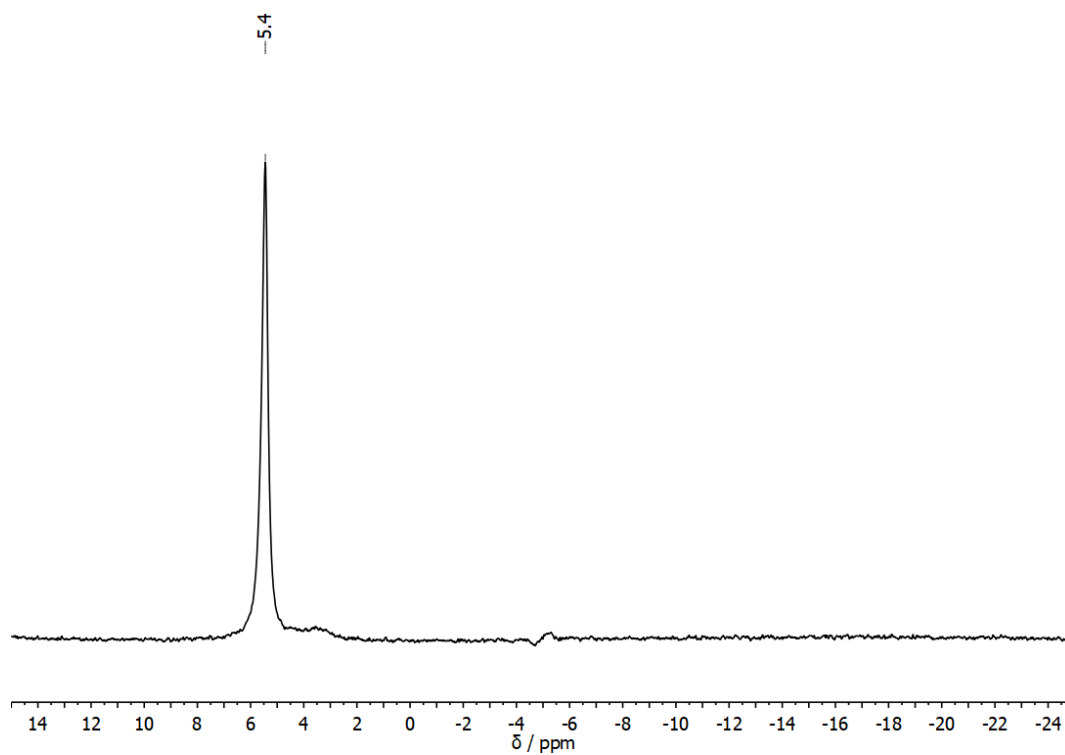

**Figure S2**  $^9\text{Be}$  NMR spectrum of  $\text{BeBr}_2$  in ethylenediamine.

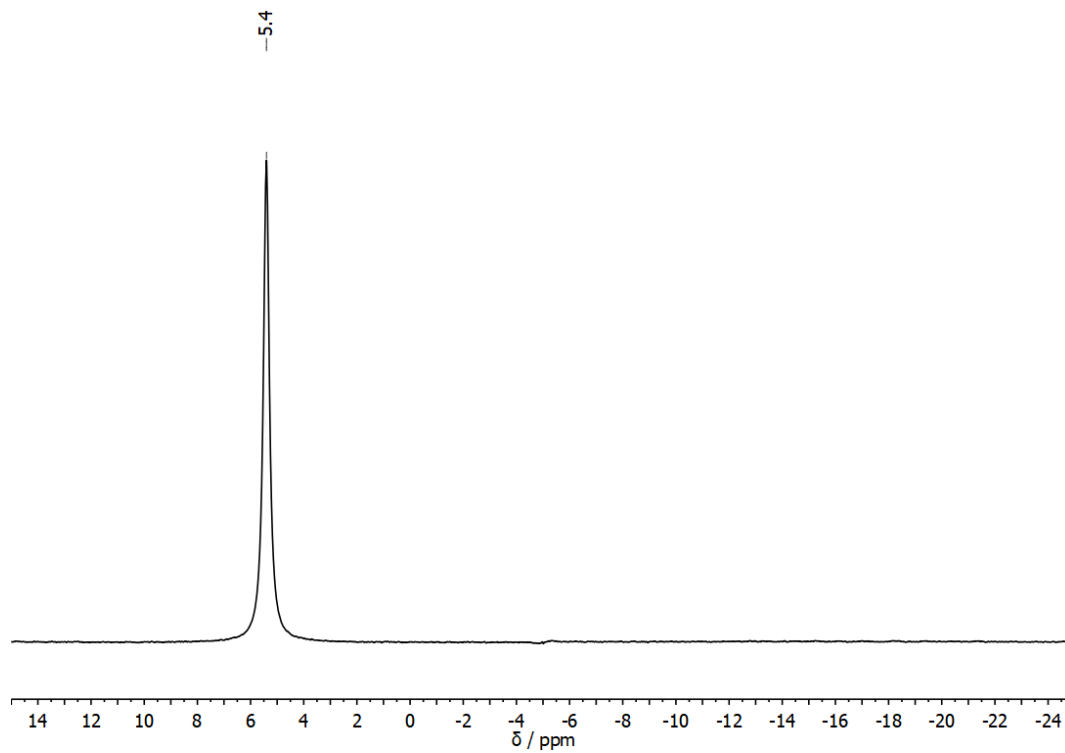

**Figure S3**  $^9\text{Be}$  NMR spectrum of  $\text{BeI}_2$  in ethylenediamine.

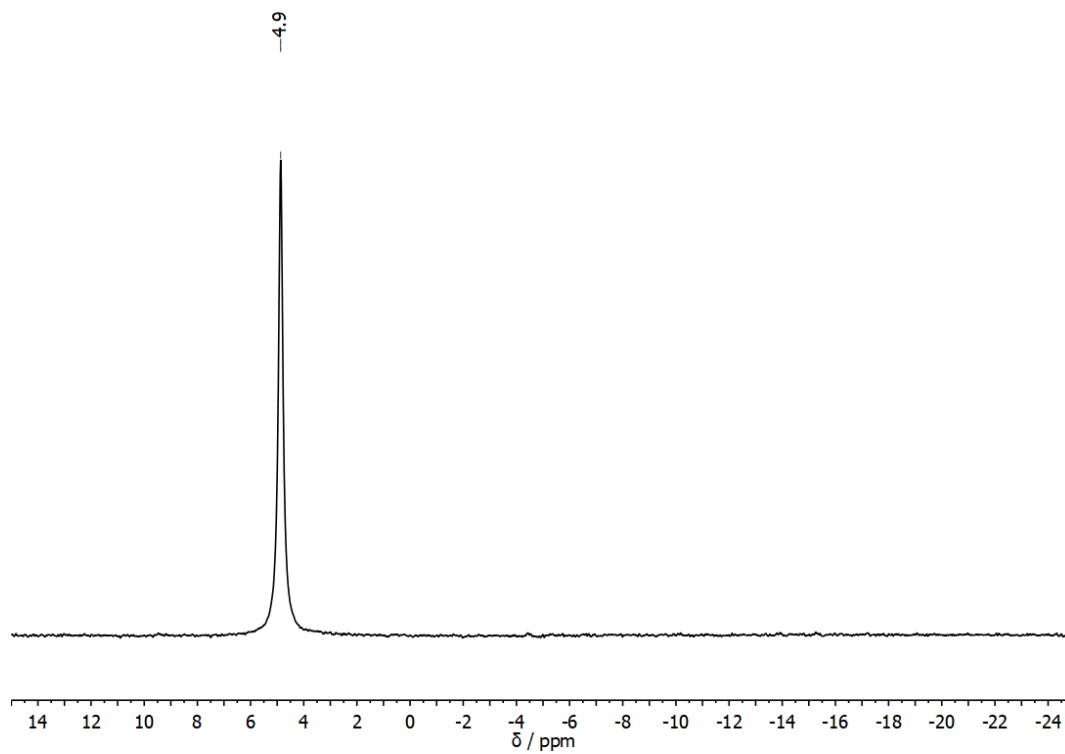

**Figure S4**  $^9\text{Be}$  NMR spectrum of  $[\text{Be}(\text{NH}_3)_4](\text{N}_3)_2$  in ethylenediamine.

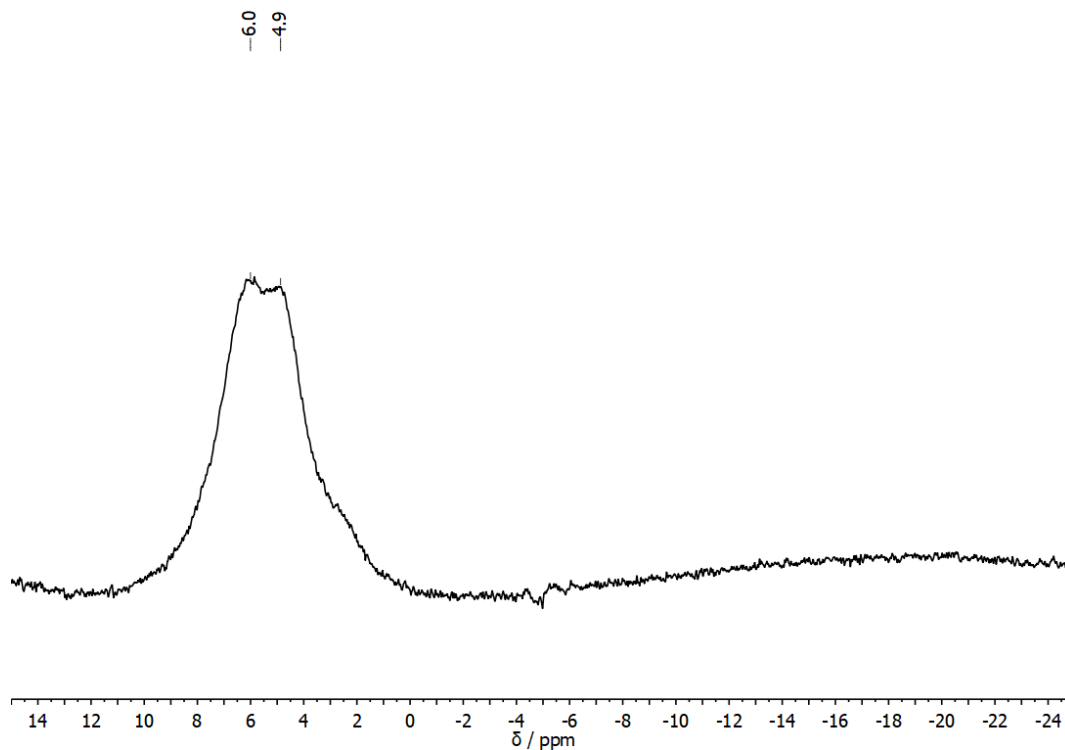

**Figure S5**  $^9\text{Be}$  NMR spectrum of  $[\text{Be}(\text{NH}_3)_4](\text{CN})_2$  in ethylenediamine.

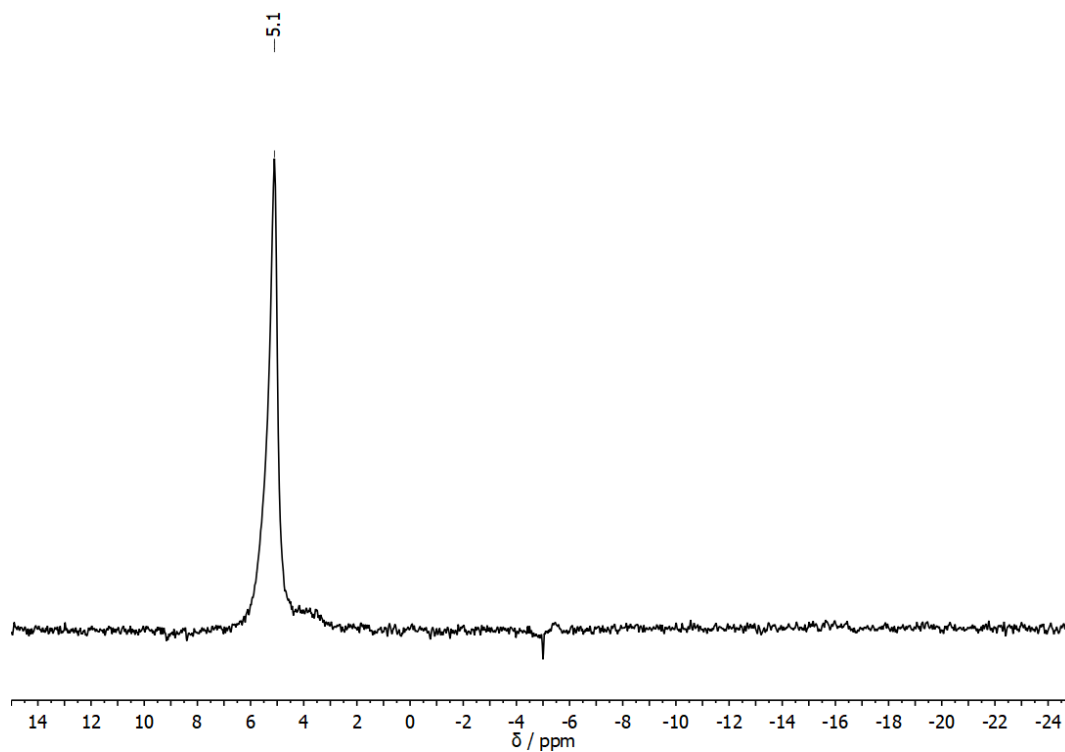

**Figure S6**  $^9\text{Be}$  NMR spectrum of  $[\text{Be}(\text{NH}_3)_4](\text{SCN})_2$  in ethylenediamine.

### 3 IR Spectra

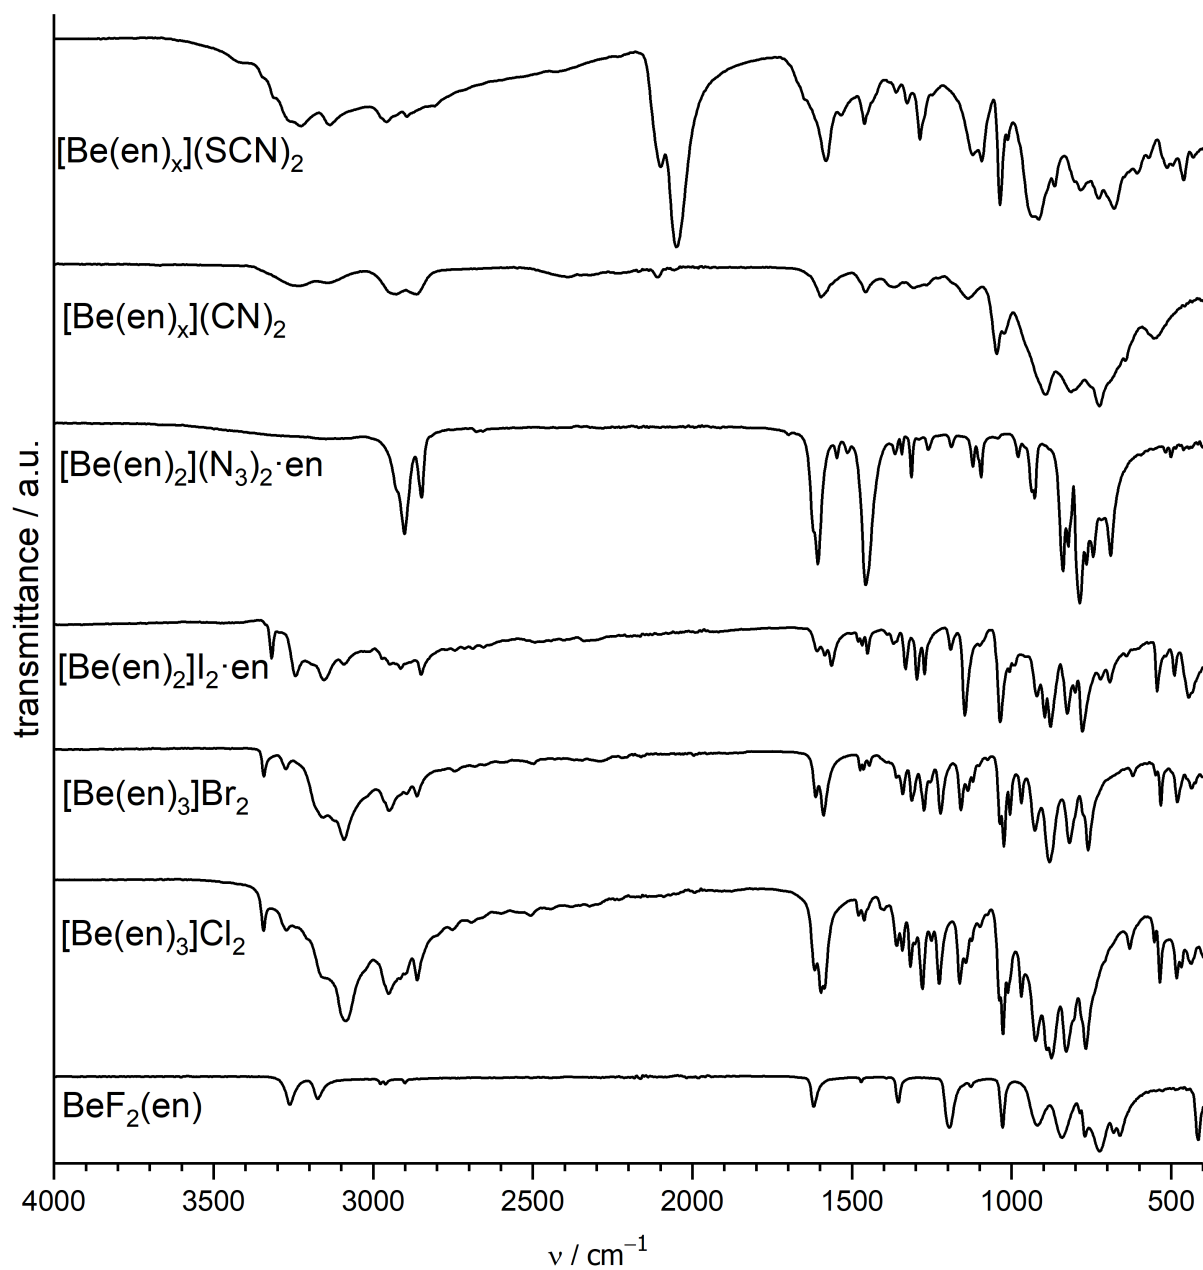

**Figure S7** IR spectra of the reaction products of ethylenediamine with  $[\text{Be}(\text{NH}_3)_4](\text{SCN})_2$  and  $[\text{Be}(\text{NH}_3)_4](\text{CN})_2$ , respectively, as well as of  $[\text{Be}(\text{en})_2](\text{N}_3)_2 \cdot \text{en}$ ,  $[\text{Be}(\text{en})_2]\text{I}_2 \cdot \text{en}$ ,  $[\text{Be}(\text{en})_3]\text{Br}_2$ ,  $[\text{Be}(\text{en})_3]\text{Cl}_2$  and  $\text{BeF}_2(\text{en})$  (from top to bottom).



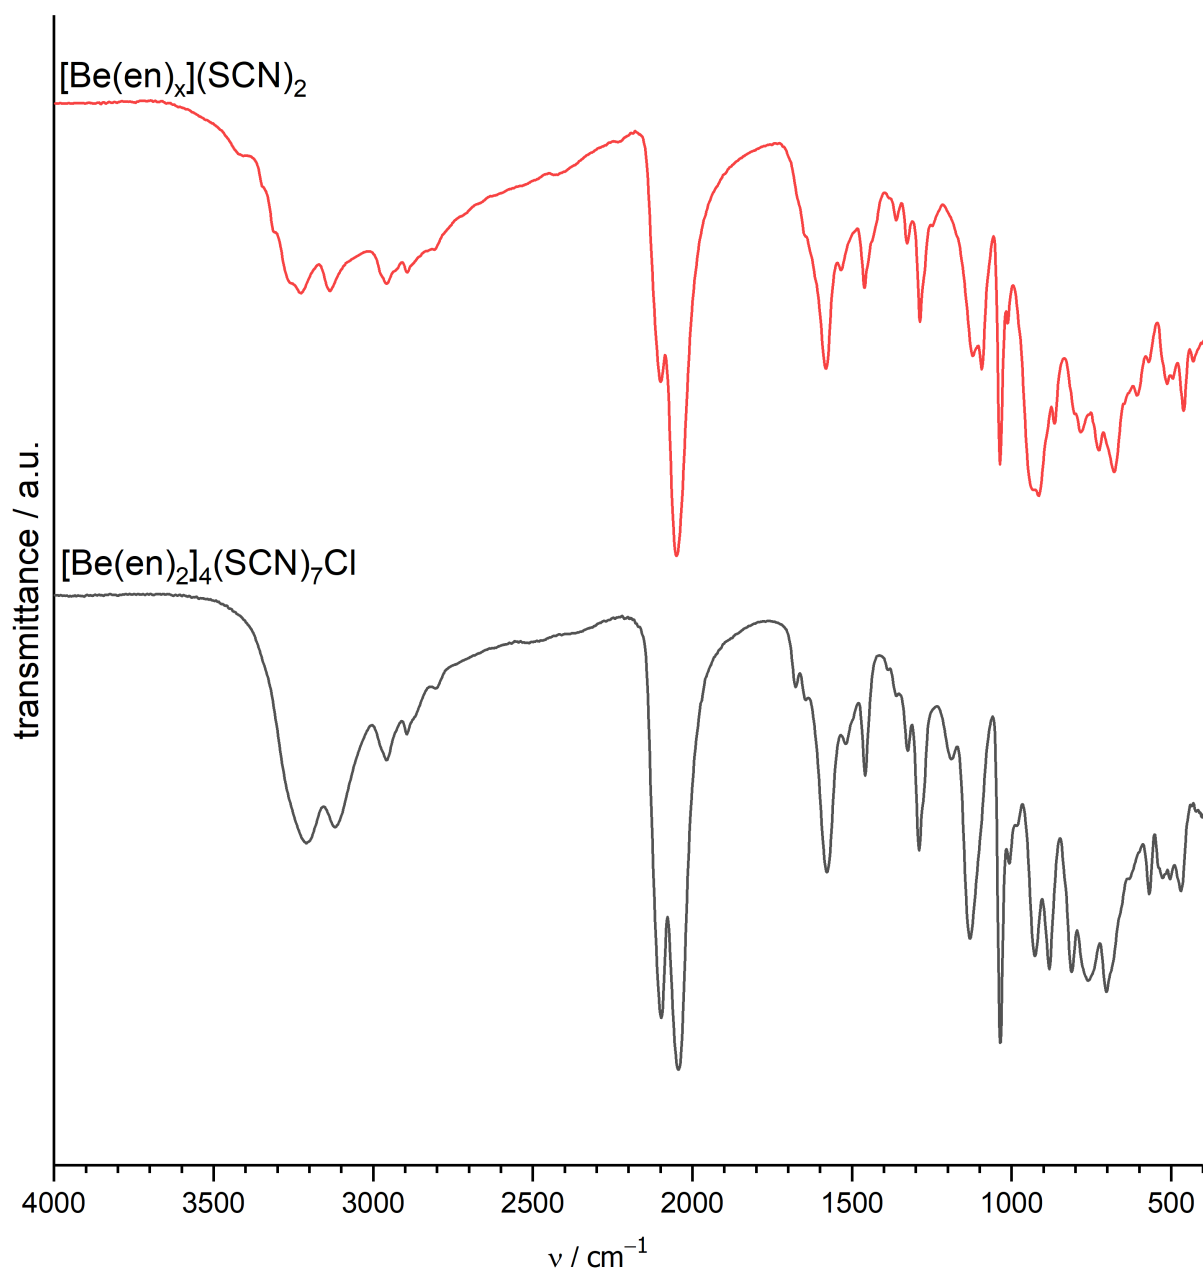

**Figure S8** IR spectra of the reaction product of ethylenediamine with  $[\text{Be}(\text{NH}_3)_4](\text{SCN})_2$  (top) and of  $[\text{Be}(\text{en})_2]_4(\text{SCN})_7\text{Cl}$  (bottom).
